# Supplementary material
Source: publisher figshare collection journal article supplement (https://asha.figshare.com/articles/dataset/_/19111532)
Supplement: Supplementary file 1 [file 1]

**Supplemental Material S2.** Distribution of responses on questions related to self-efficacy.

|                                                                                                                               | <i>n</i> | Mean  | <i>SD</i> | Always | Most of the Time | About Half the Time | Sometimes | Never |
|-------------------------------------------------------------------------------------------------------------------------------|----------|-------|-----------|--------|------------------|---------------------|-----------|-------|
| Advocacy self-efficacy total                                                                                                  | 157      | 78.99 | 18.24     |        |                  |                     |           |       |
| Stakeholder empowerment domain composite                                                                                      | 157      | 14.76 | 2.36      |        |                  |                     |           |       |
| It is difficult for me to identify effective advocacy strategies and resources.                                               | 164      | 3.11  | 1.06      | 8 %    | 36%              | 18 %                | 35%       | 3%    |
| It is difficult for me to identify whether social, political, and economic conditions affect student and teacher development. | 162      | 2.30  | 0.87      | 1 %    | 9 %              | 23 %                | 52%       | 15%   |
| I find it difficult to recognize when parent and/or teacher concerns reflect responses to systemic problems in education.     | 161      | 2.40  | 0.98      | 2 %    | 15%              | 22 %                | 45%       | 16%   |
| I help parents identify external barriers that affect their students' development.                                            | 160      | 3.03  | 1.14      | 10%    | 29%              | 20 %                | 34%       | 6%    |
| I assist students with developing self-advocacy skills.                                                                       | 157      | 3.92  | 1.10      | 38%    | 32%              | 15 %                | 14%       | 1%    |
| Community collaboration domain composite                                                                                      | 157      | 13.19 | 4.16      |        |                  |                     |           |       |
| I alert community or school groups with concerns that I become aware of through my work with students and fellow teachers.    | 164      | 2.40  | 1.20      | 6 %    | 15%              | 14 %                | 39%       | 26 %  |

|                                                                                                                                        |     |       |      |      |      |      |      |      |
|----------------------------------------------------------------------------------------------------------------------------------------|-----|-------|------|------|------|------|------|------|
| I develop alliances with groups working for change in the education system.                                                            | 161 | 1.95  | 1.05 | 3 %  | 7 %  | 13 % | 35 % | 42 % |
| I identify strengths and resources that community members bring to the process of change in the education system.                      | 160 | 2.71  | 0.99 | 3 %  | 23 % | 22 % | 44 % | 7 %  |
| I assess my effectiveness when interacting with community and school groups.                                                           | 159 | 2.94  | 1.23 | 10 % | 32 % | 13 % | 34 % | 11 % |
| I am comfortable collaborating with groups of varying size and backgrounds to improve education.                                       | 157 | 3.24  | 1.26 | 20 % | 28 % | 14 % | 32 % | 6 %  |
| Public information domain composite                                                                                                    | 157 | 11.45 | 3.55 |      |      |      |      |      |
| I prepare written and multi-media materials that demonstrate how environmental barriers contribute to student and teacher development. | 164 | 1.42  | 0.87 | 1 %  | 6 %  | 5 %  | 12 % | 76 % |
| I am able to communicate in ways that are ethical and appropriate when taking issues in education public.                              | 161 | 3.68  | 1.24 | 31 % | 35 % | 10 % | 18 % | 6 %  |
| I disseminate information about problems in education to media outlets.                                                                | 160 | 1.39  | 0.82 | 1 %  | 3 %  | 6 %  | 13 % | 76 % |
| I am able to identify and collaborate with other professionals who are involved with disseminating public information.                 | 157 | 2.59  | 1.14 | 4 %  | 23 % | 17 % | 39 % | 17 % |
| I assess the influence of my efforts to educate the general public about oppressive barriers that impact students and teachers.        | 157 | 2.36  | 1.18 | 6 %  | 13 % | 22 % | 32 % | 28 % |
| Stakeholder advocacy domain composite                                                                                                  | 157 | 15.95 | 3.91 |      |      |      |      |      |

|                                                                                                                        |     |       |             |     |     |     |     |     |
|------------------------------------------------------------------------------------------------------------------------|-----|-------|-------------|-----|-----|-----|-----|-----|
| I am comfortable with negotiating for relevant services on behalf of students.                                         | 164 | 3.66  | <i>1.06</i> | 22% | 40% | 19% | 16% | 3%  |
| I am skilled at helping students and parents gain access to needed resources.                                          | 161 | 3.21  | <i>1.03</i> | 8%  | 38% | 24% | 27% | 3%  |
| I am able to identify barriers that affect the well-being of individuals and vulnerable groups in my school.           | 160 | 3.46  | <i>0.99</i> | 10% | 48% | 21% | 17% | 3%  |
| I am comfortable with developing a plan of action to confront barriers that impact students and teachers.              | 159 | 2.69  | <i>1.20</i> | 7%  | 24% | 16% | 36% | 17% |
| I am able to identify allies who can help confront barriers that impact student and teacher development.               | 157 | 2.96  | <i>1.11</i> | 8%  | 28% | 22% | 36% | 6%  |
| Systems advocacy domain total composite                                                                                | 157 | 11.95 | <i>4.36</i> |     |     |     |     |     |
| I use data to demonstrate urgency for improvement of the education system.                                             | 164 | 2.60  | <i>1.27</i> | 6%  | 27% | 11% | 33% | 24% |
| I am able to analyze the sources of political power and social systems that influence student and teacher development. | 161 | 2.38  | <i>1.13</i> | 3%  | 20% | 15% | 38% | 25% |
| I am comfortable developing an action plan to make changes to the current education system.                            | 160 | 2.01  | <i>1.10</i> | 2%  | 13% | 10% | 33% | 42% |
| I am able to recognize and deal with resistance when involved in advocacy.                                             | 157 | 2.60  | <i>1.11</i> | 3%  | 24% | 21% | 35% | 17% |
| I assess the effectiveness of my advocacy efforts on the education system and its constituents.                        | 157 | 2.39  | <i>1.19</i> | 5%  | 16% | 20% | 32% | 27% |

|                                                                                   |     |       |      |     |     |     |     |     |
|-----------------------------------------------------------------------------------|-----|-------|------|-----|-----|-----|-----|-----|
| Social/Political advocacy domain total                                            | 157 | 11.69 | 3.82 |     |     |     |     |     |
| I know when problems need to be resolved through social and legislative advocacy. | 164 | 2.35  | 1.05 | 3%  | 15% | 19% | 42% | 21% |
| I seek out and join with potential allies to confront problems in education.      | 161 | 2.17  | 1.14 | 5%  | 12% | 13% | 38% | 32% |
| I support existing alliances and movements for improving education.               | 160 | 3.04  | 1.25 | 15% | 28% | 13% | 26% | 9%  |
| I collaborate with allies in using data to improve education.                     | 157 | 2.48  | 1.17 | 4%  | 20% | 18% | 36% | 22% |
| I lobby legislators and policy makers to create change in the education system.   | 157 | 1.61  | 0.92 | 0%  | 6%  | 9%  | 24% | 61% |

*Note.* Domain scores had a possible range between 5 and 25, and total scores had a possible range between 30 and 150; with high scores indicating positive self-perception of advocacy competence and effectiveness.
